# Supplementary material for: Compositional and Metabolic Responses of Autotrophic Microbial Community to Salinity in Lacustrine Environments
Source: PubMed Central journal article supplement (PMC9426519; doi:10.1128/msystems.00335-22), 2022-07-12

a

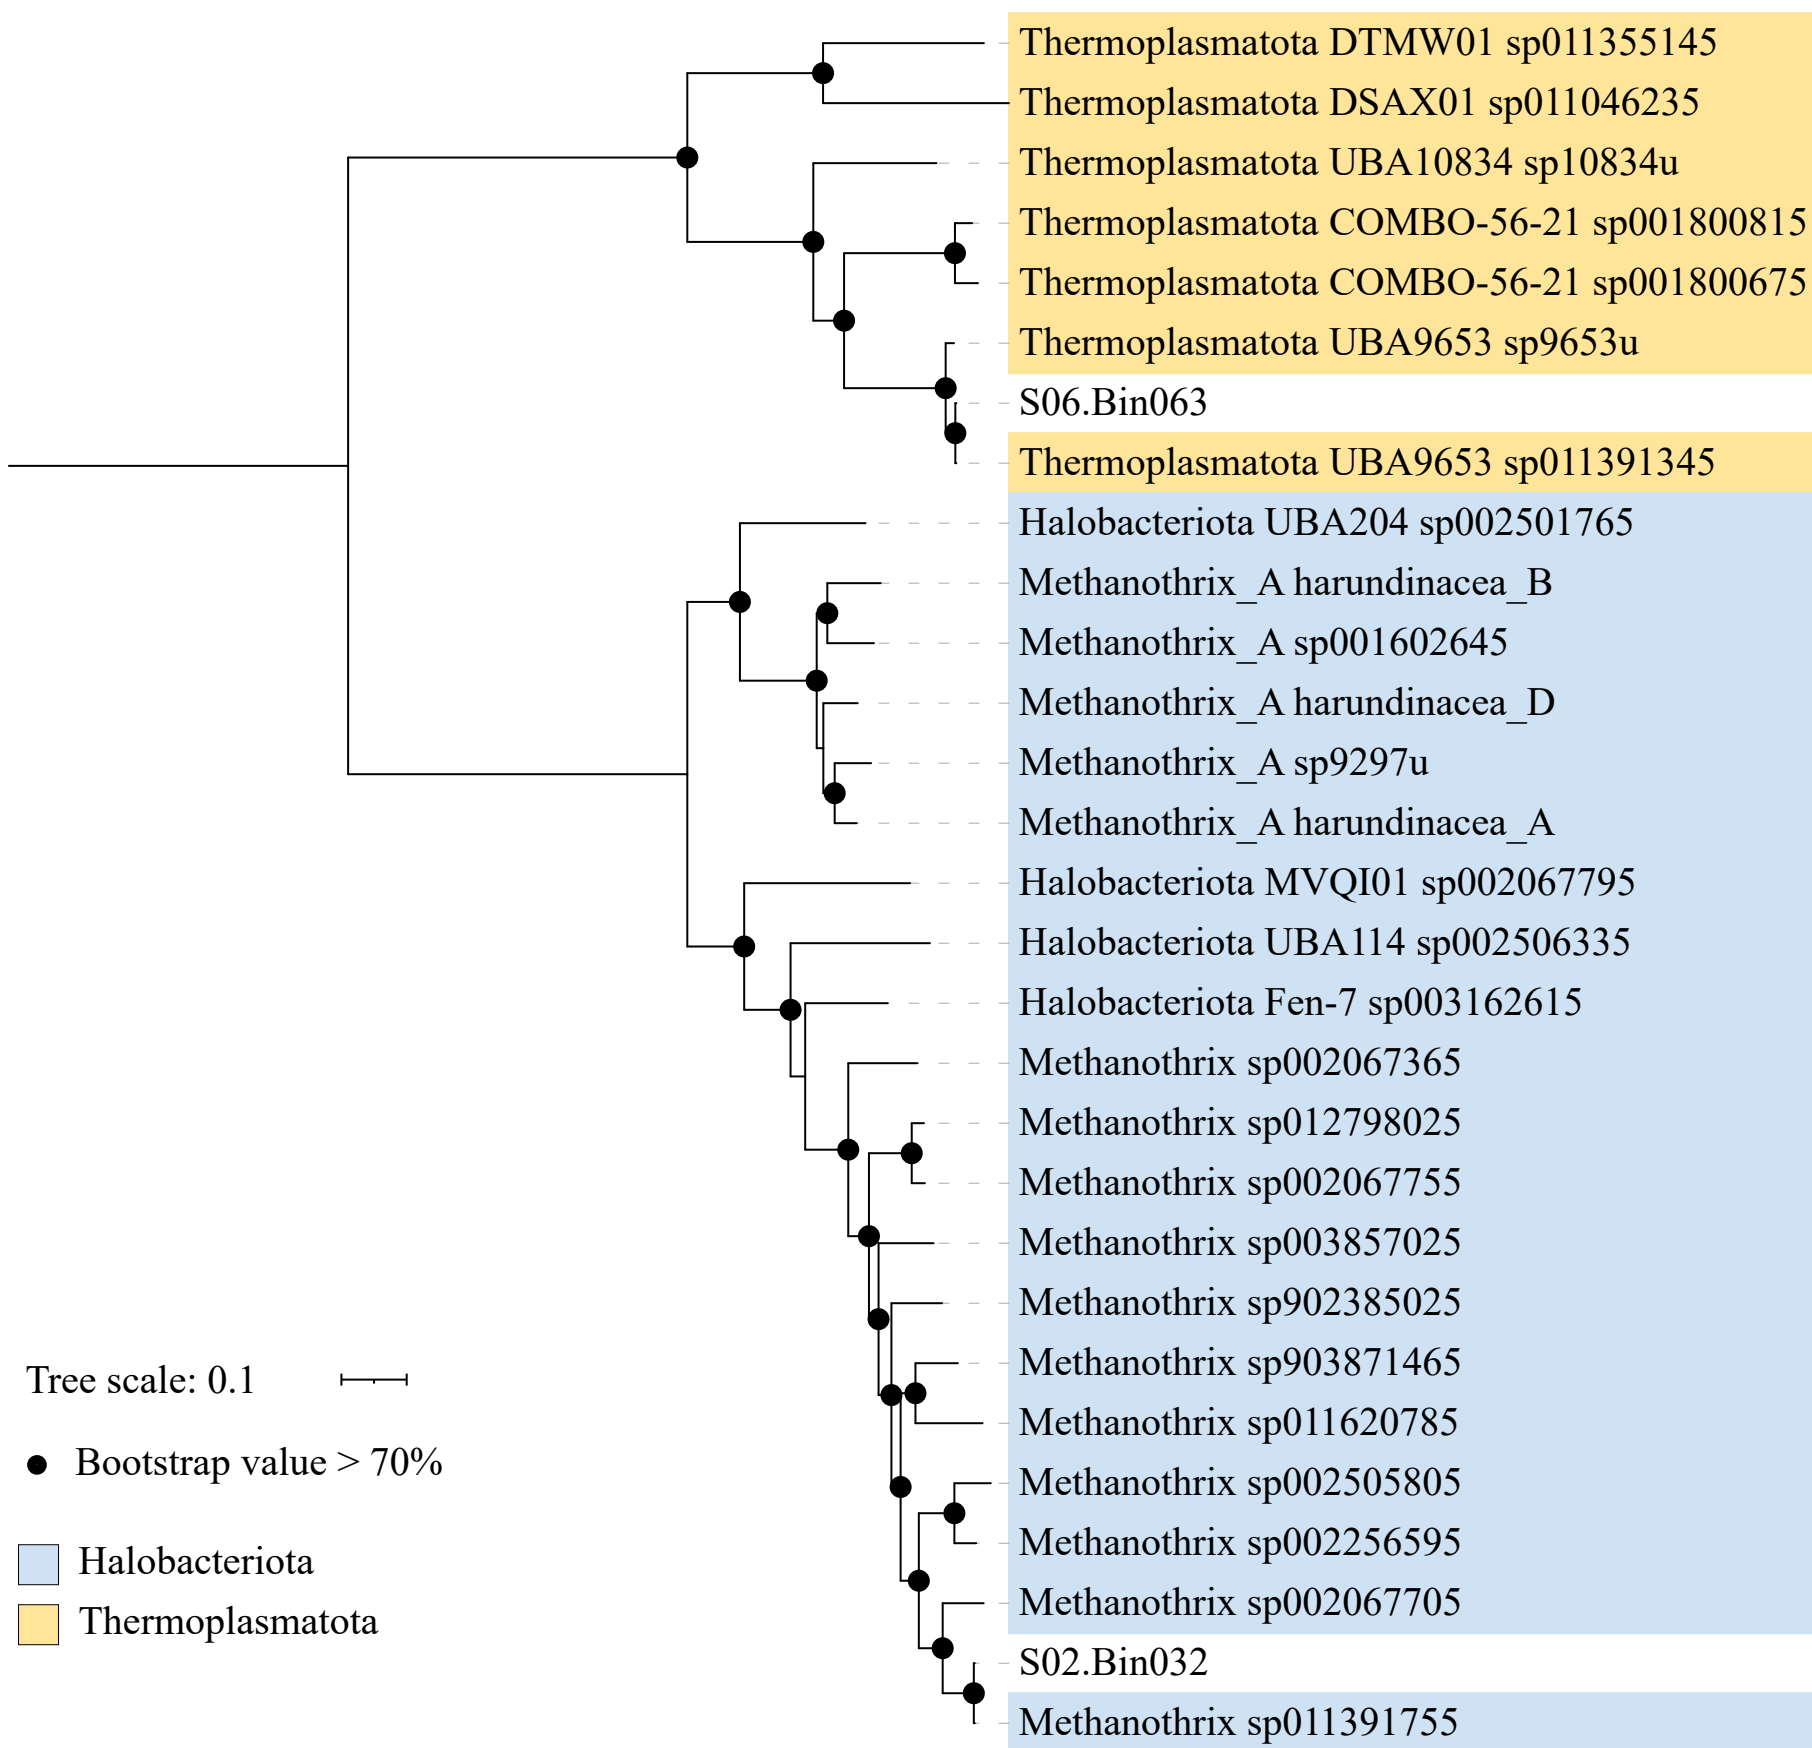

b

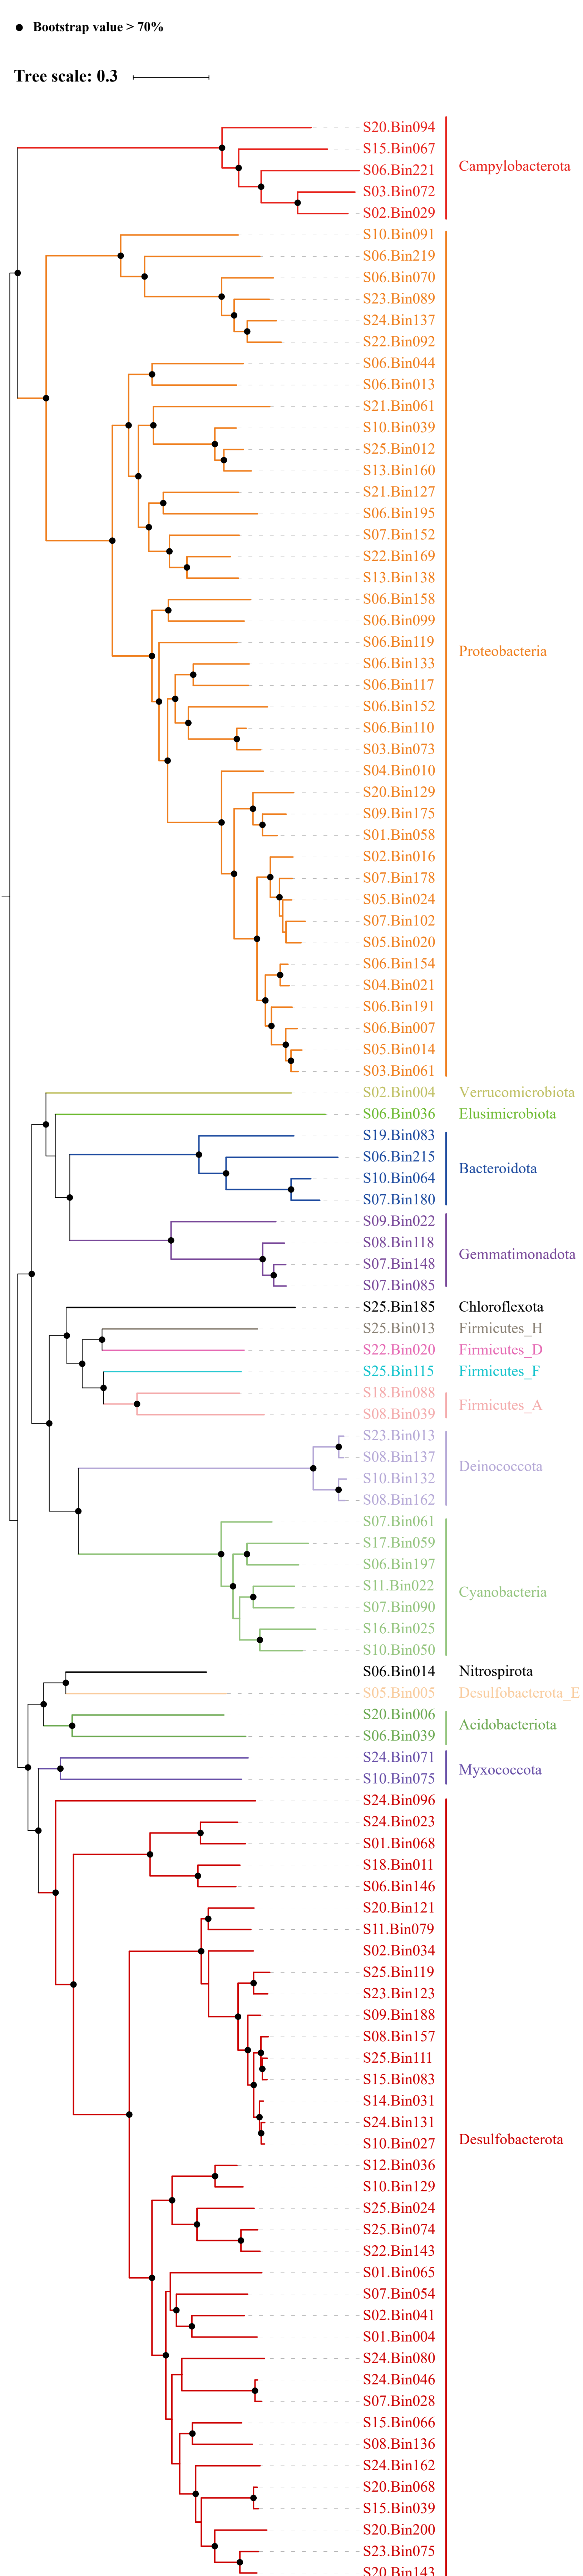

Supplement: msystems.00335-22-s0001.pdf [file msystems.00335-22-s0001.pdf]
